# Supplementary material for: Efficient mechanical modulation of the phonon thermal conductivity of Mo6S6 nanowires
Source: Royal Society of Chemistry journal article supplement (doi:10.1039/d1nr08505k), 2022-01-01
Supplement: d1nr08505k1.pdf [file d1nr08505k1.pdf]

## Supporting Information

### **Efficient mechanical modulation of the phonon thermal conductivity of Mo<sub>6</sub>S<sub>6</sub> nanowires**

Ke Xu,<sup>1, #</sup> Shichen Deng,<sup>2, #</sup> Ting Liang,<sup>3</sup> Xuezheng Cao,<sup>1</sup> Meng Han,<sup>3</sup> Xiaoliang Zeng,<sup>3</sup> Zhisen Zhang,<sup>1</sup> Nuo  
Yang,<sup>2, a)</sup> and Jianyang Wu<sup>1, 4, b)</sup>

<sup>1</sup>Department of Physics, Research Institute for Biomimetics and Soft Matter, Jiujiang Research  
Institute and Fujian Provincial Key Laboratory for Soft Functional Materials Research, Xiamen  
University, Xiamen 361005, PR China

<sup>2</sup>State Key Laboratory of Coal Combustion, and School of Energy and Power Engineering,  
Huazhong University of Science and Technology (HUST), Wuhan, 430074 PR China

<sup>3</sup>Shenzhen Institute of Advanced Electronic Materials, Shenzhen Institutes of Advanced Technology,  
Chinese Academy of Sciences, Shenzhen 518055, PR China

<sup>4</sup>NTNU Nanomechanical Lab, Norwegian University of Science and Technology (NTNU),  
Trondheim 7491, Norway

---

# These authors contributed equally to this work.

<sup>a)</sup> Electronic mail: [nuo@hust.edu.cn](mailto:nuo@hust.edu.cn) (N. Y.)

<sup>b)</sup> Electronic mail: [jianyang@xmu.edu.cn](mailto:jianyang@xmu.edu.cn) (J. W.)

## 1. Molecular Models of Deformed Mo<sub>6</sub>S<sub>6</sub> Nanowire

Table S1 lists the detailed information of both stretched and twisted Mo<sub>6</sub>S<sub>6</sub> nanowires. All the investigated atomic models of Mo<sub>6</sub>S<sub>6</sub> nanowires are composed of identical number of atoms (6000). However, as a result of axial elongation and twisting deformation, they show different lattice constants in axial direction. Figure S1 shows the detailed structural information of Mo<sub>6</sub>S<sub>6</sub> nanowires subjected to axial tension and torsional strain.

**Table S1** Structural information of mechanically-deformed Mo<sub>6</sub>S<sub>6</sub> nanowires

| Stretched Nanowires             |      |       |      |       | No. 6000 |       |      |      |
|---------------------------------|------|-------|------|-------|----------|-------|------|------|
| Tensile Strain (m/m)            | 0.0  | 0.005 | 0.01 | 0.015 | 0.02     | 0.025 | 0.03 | 0.04 |
| Axial Length C <sub>1</sub> (Å) | 4.60 | 4.63  | 4.65 | 4.67  | 4.69     | 4.72  | 4.74 | 4.79 |
| Twisted Nanowires               |      |       |      |       | No. 6000 |       |      |      |
| Torsional Strain (°/nm)         | 0.0  | 10.5  | 21.0 | 31.7  | 42.4     | 53.3  | 64.2 | 75.2 |
| Axial Length C <sub>1</sub> (Å) | 4.60 | 4.58  | 4.57 | 4.55  | 4.53     | 4.51  | 4.49 | 4.47 |

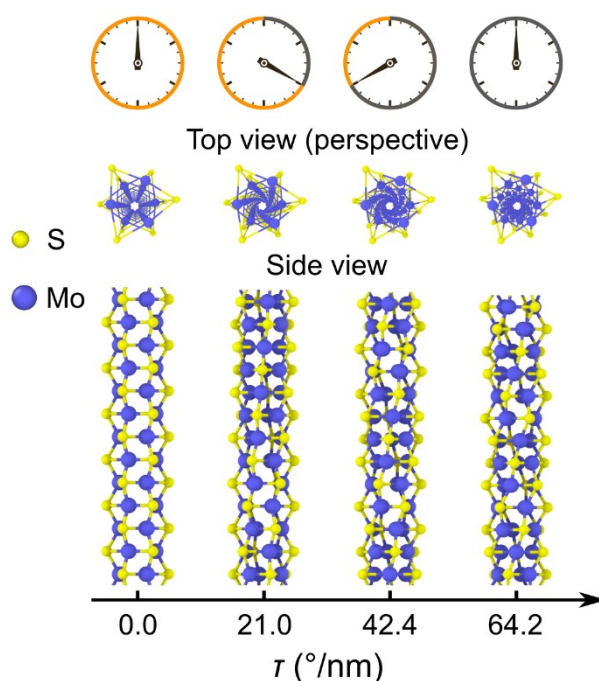

**Figure S1** Schematic of Mo<sub>6</sub>S<sub>6</sub> nanowire subjected to four different torsional strains ( $\tau$ ) that are 0.0, 21.0, 42.4 and 64.2°/nm, respectively. For top schematic, the clockwise rotation is used to indicate the

twisting angles of  $\text{Mo}_6\text{S}_6$  nanowire. For bottom-viewed atomic models, the Mo and S atoms in  $\text{Mo}_6\text{S}_6$  nanowire are yellow- and blue-colored for clarification.

## 2. Methodology

### 2.1 Settings of NEMD simulations

The detailed setting parameters of all NEMD simulations are listed in Table S2. ReaxFF potential is a powerful tool to study a wide range of systems<sup>1-4</sup>. On the other hand, the popular forcefields of Mo-S type REBO<sup>5</sup> and SW<sup>6</sup> are tested, While, both Mo-S type REBO<sup>5</sup> and SW forcefields are not able to stabilize Mo<sub>6</sub>S<sub>6</sub> nanowire. A small timestep of 0.2 fs is adopted to perform the NEMD. For Mo-S systems, ReaxFF forcefield was also adopted to study the thermal<sup>7, 8</sup> and mechanical properties<sup>9, 10</sup>. The simulation procedure is summarized as follows. After minimization, the NPT ensemble is used to relax the Mo<sub>6</sub>S<sub>6</sub> nanowire structure for 1 ns. Then, except for the thermostat regions, the rest of the system is simulated by NVE ensemble for 8 ns to reach the steady state. Finally, a longer simulation using NVE ensemble is performed for 2 ns to record and average the temperature and heat flux. Here, we use a more efficient NEMD method with fixed boundaries, as shown in Figure S2b.

**Table S2.** NEMD simulation details

| <b>Method</b>                     |                    | Non-Equilibrium molecular dynamics |                    |
|-----------------------------------|--------------------|------------------------------------|--------------------|
| <b>Parameters</b>                 |                    |                                    |                    |
| <b>Potential</b>                  | ReaxFF             | <b>Time step</b>                   | 0.2 fs             |
| <b>Thermostat</b>                 | Langevin           | <b>Temperature difference</b>      | 30 K               |
| <b>Simulation process</b>         |                    |                                    |                    |
| <b>Ensemble</b>                   | <b>Setting</b>     |                                    | <b>Purpose</b>     |
| NVT                               | Boundary condition | x, y, z: p, p, f                   | Relax structure    |
|                                   | Runtime            | 1 ns                               |                    |
| NVE                               | Boundary condition | x, y, z: p, p, f                   | Reach steady state |
|                                   | Runtime            | 8 ns                               |                    |
| NVE                               | Boundary condition | x, y, z: p, p, f                   | Reach information  |
|                                   | Runtime            | 2 ns                               |                    |
| <b>Recorded physical quantity</b> |                    |                                    |                    |

|                             |                                                                                |
|-----------------------------|--------------------------------------------------------------------------------|
| <b>Temperature</b>          | $\langle E \rangle = \sum_{i=1}^N \frac{1}{2} m^i v_i^2 = \frac{3}{2} N k_B T$ |
| <b>Heat flux</b>            | $J = \frac{\Delta E_{in} + \Delta E_{out}}{2\Delta t}$                         |
| <b>Thermal conductivity</b> | $\kappa = -\frac{J}{A\nabla T} = -\frac{JL}{A\Delta T}$                        |

## 2.2 NEMD method

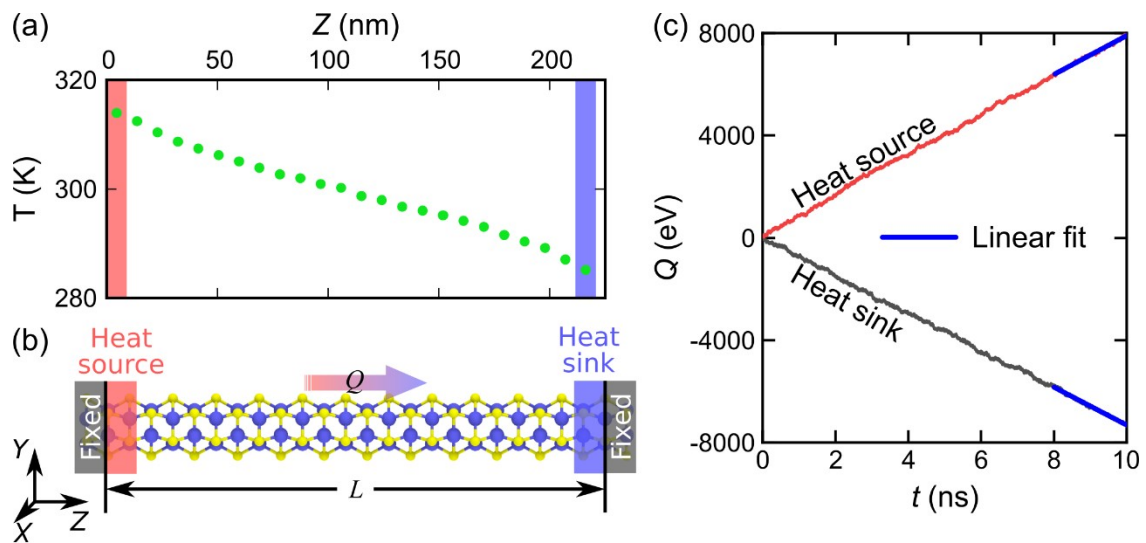

**Figure S2** (a) Steady-state temperature profile in the Mo<sub>6</sub>S<sub>6</sub> system. (b) The axial direction of the tube is the  $z$  direction, and the heat flow ( $Q$ ) transfer is imposed in this direction. (c) The energy of the source and sink thermostat as a function of the time in steady state.

### 3 The phonon thermal conductivity

#### 3.1 Phonon transmission spectra and Accumulated thermal conductivity

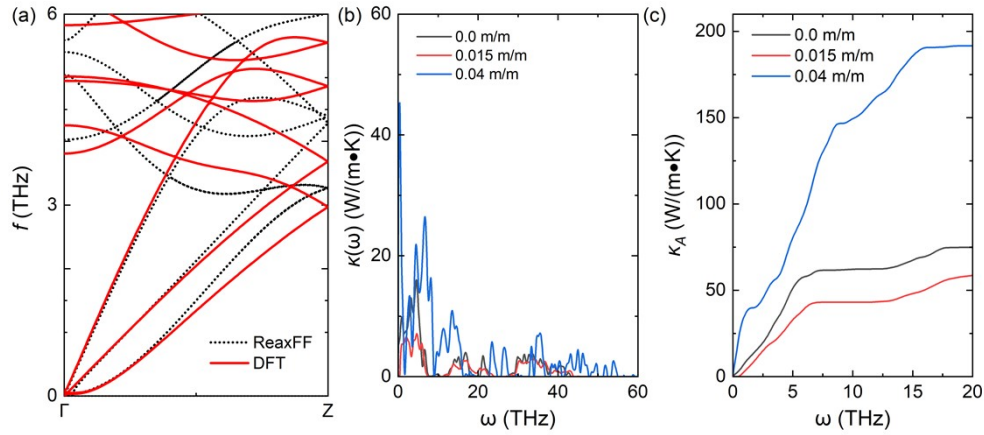

Figure S3. (a) Phonon dispersion predicted by ReaxFF-based MD calculations and DFT calculations ( $\omega < \omega_{\max}^A$ ,  $\omega_{\max}^A = 6$  THz). (b) Phonon transmission spectra ( $\kappa(\omega)$ ) of  $\text{Mo}_6\text{S}_6$  nanowire with frequency ( $\omega$ ) range at 0-60 THz. (c) Accumulated thermal conductivity ( $\kappa_A$ ) of  $\text{Mo}_6\text{S}_6$  nanowire with frequency ( $\omega$ ) range at 0-20 THz.

Here, the spectral thermal conductivity of  $\text{Mo}_6\text{S}_6$  NW is calculated from the transmission coefficient, as shown in Figure S3(a). As is indicated, the thermal conductivity of  $\text{Mo}_6\text{S}_6$  NW subjected to zero strain is largely contributed by the low-frequency region. Such case is also identified as  $\text{Mo}_6\text{S}_6$  NW is stretched and twisted, as shown in the Figure S3(b). Therefore, the dependence of the thermal conductivity on mechanical strains is dictated by low-frequency contributions.

To verify the accuracy of our ReaxFF-based MD results, the phonon spectrum is also predicted by density functional theory (DFT) calculations, as shown in the Figure S3(c). The black dashed lines are the phonon dispersion relation curves of  $\text{Mo}_6\text{S}_6$  NW at zero strain obtained from a lattice dynamic program Phonopy<sup>11</sup>. The phonon dispersion with DFT calculations was extracted from VASP<sup>12</sup> (Vienna Ab initio Simulation Package), in which the PBE was used for the exchange-correlation

functional, and self-consistent calculation was performed with a cutoff energy of 600 eV and a force convergence criterion of  $10^{-7}$  eV/Å. By comparison, it is found that phonon spectrogram of  $\text{Mo}_6\text{S}_6$  NW in the low-frequency region predicted by ReaxFF-based MD calculations are in good agreement with that by DFT calculations. Given that the thermal conductivity of  $\text{Mo}_6\text{S}_6$  NW by ReaxFF-based MD simulations is largely contributed by the low-frequency region. Therefore, the thermal conductivity of  $\text{Mo}_6\text{S}_6$  NW by ReaxFF-based MD calculations is reliable.

### 3.2 Phonon thermal conductivity and $\nu$ DOS of full frequency.

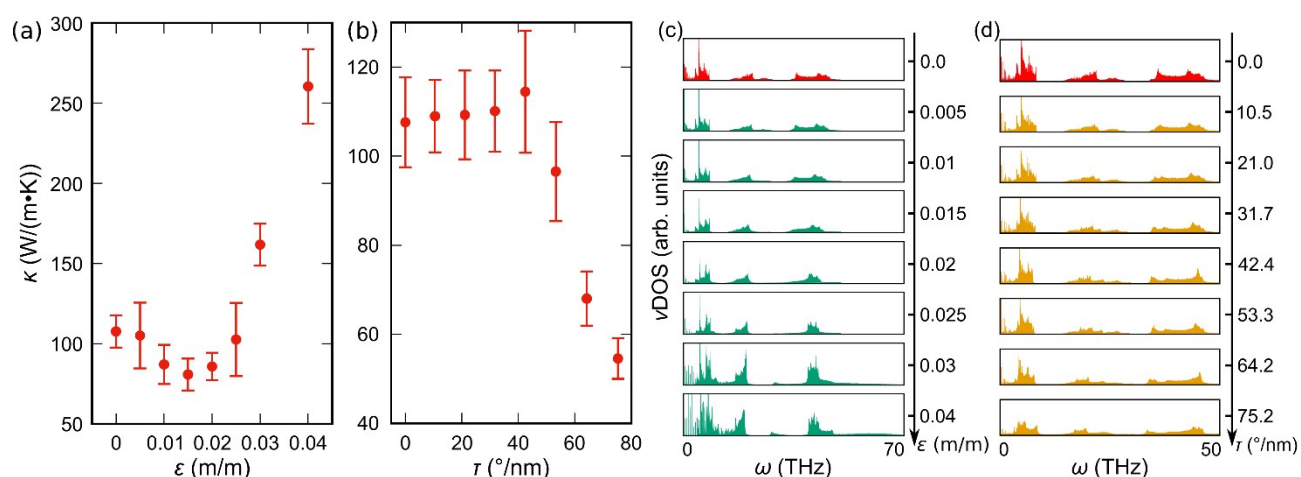

Figure S4 (a) and (b) Variations in the phonon thermal conductivity ( $\nu$ DOS) of  $\text{Mo}_6\text{S}_6$  nanowire with tensile ( $\epsilon$ ) and torsional ( $\tau$ ) strains, respectively. (c) and (d)  $\nu$ DOS of isolated  $\text{Mo}_6\text{S}_6$  nanowire subjected to different tensile and torsional strains.

As shown in the Figures S3(c-d), the upper-bound frequency is increased, for example, it reaches about 65 THz at axial tension strain of 0.04. Such strain-induced transition change in the  $\nu$ DOS spectra explains the crossover of phonon thermal conductivity in  $\text{Mo}_6\text{S}_6$  NW.

### 3.3 Size effect and three-phonon scattering

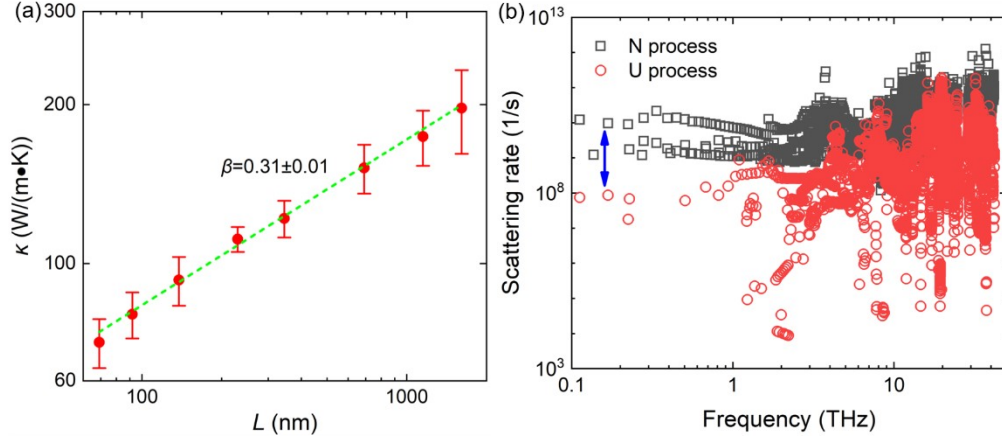

Figure S5. (a) Thermal conductivity ( $\kappa$ ) for  $\text{Mo}_6\text{S}_6$  nanowire at 300 K with different lengths ( $L$ ) from the NEMD simulations. (b) Three-phonon scattering rates in  $\text{Mo}_6\text{S}_6$  nanowires subjected to zero strain as a function of phonon frequency, including Normal and Umklapp processes.

It is well known that there is size effect on the thermal conductivity of low-dimensional materials. As shown in the Figure S5a, the size effect of thermal conductivity of  $\text{Mo}_6\text{S}_6$  NW is also examined. Figure R4 shows the variation in the thermal conductivity of  $\text{Mo}_6\text{S}_6$  NW with axial length. It is revealed that the thermal conductivity of  $\text{Mo}_6\text{S}_6$  NW follows  $\kappa \propto L^\beta$ , and here  $\beta = 0.31$ . This suggests that the thermal conductivity of  $\text{Mo}_6\text{S}_6$  NW follows one-dimensional (1D) nonlinear lattice model. Our results are in good agreement with previous predictions of 1D nanostructure, namely, the thermal conductivity of 1D materials is length dependent<sup>13, 14</sup>. In our study,  $\text{Mo}_6\text{S}_6$  NW with finite axial length of 200 nm is generated to reveal the role of tension and torsion strains on the thermal conductivity.

As shown in Figure S5b, we calculated the three-phonon scattering rates of the  $\text{Mo}_6\text{S}_6$  NW. The three-phonon scattering rates is calculated by PHONO3PY<sup>15</sup> and includes the Normal process and Umklapp process. The third-order interatomic force constants, with an atomic displacement of 0.03 Å,



is calculated from the finite difference method. As is indicated, the normal ( $N$ ) process is around two orders of magnitudes stronger than the Umklapp ( $U$ ) process in low-frequency range ( $< 1$  THz).

### 3.4 Phonon dispersion relationship

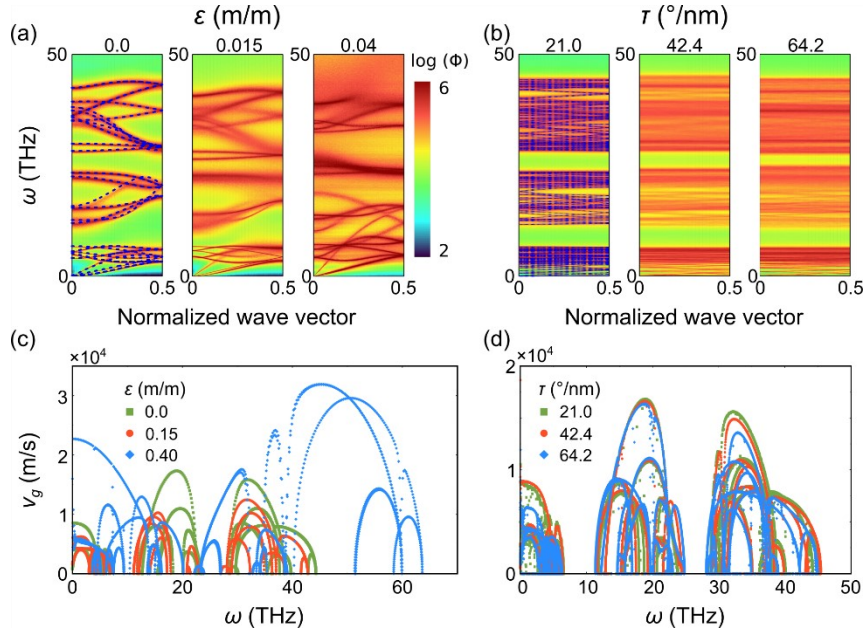

Figure S6 (a) and (b) Phonon dispersion relationship of isolated  $\text{Mo}_6\text{S}_6$  nanowire subjected to three critical tensile ( $\epsilon$ ) and torsional ( $\tau$ ) strains, respectively. (c) and (d) Phonon group velocity ( $v_g$ ) as a function of frequency ( $\omega$ ) for isolated  $\text{Mo}_6\text{S}_6$  nanowire under three critical tensile ( $\epsilon$ ) and torsional ( $\tau$ ) strains, respectively.

The blue dashed lines are the phonon dispersion relation curves of  $\text{Mo}_6\text{S}_6$  NW at zero strain obtained from a lattice dynamic program Phonopy<sup>11</sup>. As shown in the Figure S4, the highest frequency is enlarged to about 65 THz, but at high frequency region, the SED curves are not able to distinguish, indicating severe phonon scattering. The high frequency phonons cover a wide frequency range, and the group velocity is tripled, thereby resulting in increase in the phonon thermal conductivity.

#### 4. Bond length distribution

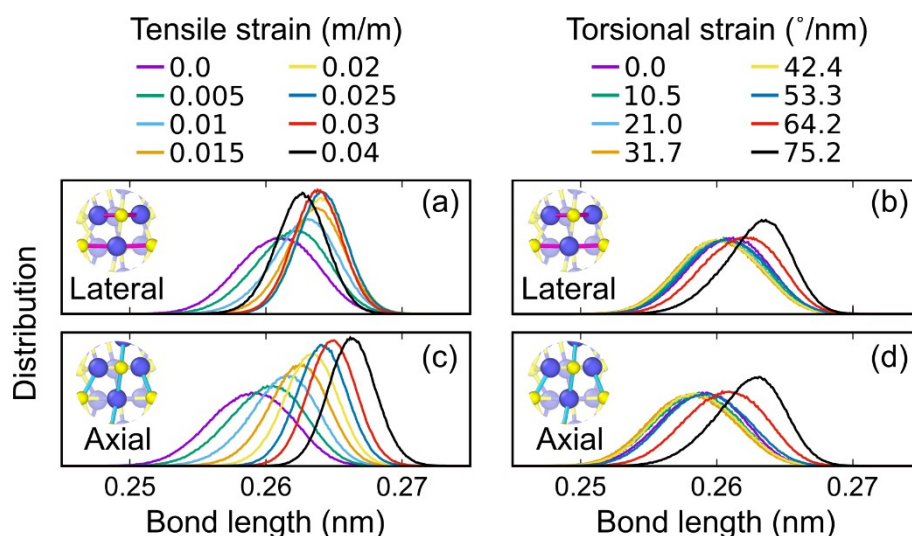

**Figure S7** (a) and (c) Distribution of bond length of unique Mo-S bond that makes  $0^\circ$  and  $90^\circ$  angles to the axial direction of wire as the  $\text{Mo}_6\text{S}_6$  nanowire is subjected to different tension strains ( $\epsilon$ ), respectively. (a) and (c) Distribution of bond length of unique Mo-S bond that makes  $0^\circ$  and  $90^\circ$  angles to the axial direction of wire as the  $\text{Mo}_6\text{S}_6$  nanowire is subjected to different torsional strains ( $\tau$ ) respectively.

#### References

1. N. C. Osti, M. Naguib, A. Ostadhossein, Y. Xie, P. R. C. Kent, B. Dyatkin, G. Rother, W. T. Heller, A. C. T. van Duin, Y. Gogotsi and E. Mamontov, *ACS Appl. Mater. Interfaces*, 2016, **8**, 8859-8863.
2. A. Ostadhossein, E. D. Cubuk, G. A. Tritsarlis, E. Kaxiras, S. Zhang and A. C. T. van Duin, *Phys. Chem. Chem. Phys.*, 2015, **17**, 3832-3840.
3. K. Yoon, A. Ostadhossein and A. C. T. van Duin, *Carbon*, 2016, **99**, 58-64.
4. M. M. Islam, A. Ostadhossein, O. Borodin, A. T. Yeates, W. W. Tipton, R. G. Hennig, N. Kumar and A. C. T. van Duin, *Phys. Chem. Chem. Phys.*, 2015, **17**, 3383-3393.
5. T. Liang, S. R. Phillpot and S. B. Sinnott, *Phys. Rev. B*, 2009, **79**, 245110.
6. J.-W. Jiang, *Nanotechnology*, 2015, **26**, 315706.
7. B. Mortazavi, R. Quey, A. Ostadhossein, A. Villani, N. Moulin, A. C. T. van Duin and T. Rabczuk, *Applied Materials Today*, 2017, **7**, 67-76.
8. H. Farahani, A. Rajabpour, M. Khanaki and A. Reyhani, *Comput. Mater. Sci.*, 2018, **142**, 1-6.
9. B. Mortazavi, A. Ostadhossein, T. Rabczuk and A. C. T. van Duin, *Phys. Chem. Chem. Phys.*, 2016, **18**, 23695-23701.
10. A. Ostadhossein, A. Rahnamoun, Y. Wang, P. Zhao, S. Zhang, V. H. Crespi and A. C. T. van Duin, *J. Phys. Chem. Lett.*, 2017, **8**, 631-640.
11. A. Togo and I. Tanaka, *Scripta Mater.*, 2015, **108**, 1-5.

12. G. Kresse and J. Furthmüller, *Phys. Rev. B*, 1996, **54**, 11169-11186.
13. J.-S. Wang and B. Li, *Phys. Rev. Lett.*, 2004, **92**, 074302.
14. N. Yang, G. Zhang and B. Li, *Nano Today*, 2010, **5**, 85-90.
15. A. Togo, L. Chaput and I. Tanaka, *Phys. Rev. B*, 2015, **91**, 094306.
